# Supplementary material for: Chickens can durably clear herpesvirus vaccine infection in feathers while still carrying vaccine-induced antibodies
Source: Springer Nature journal article supplement (doi:10.1186/s13567-020-00749-1), 2020-02-24
Supplement: MOESM1 [file 13567_2020_749_MOESM1_ESM.pdf]

| Subject | Line | Date | Group | HVTLog10 | AcHILog2 | AcELISA |
|---------|------|------|-------|----------|----------|---------|
| N01     | Nu   | W02  | NuW2  | 2.805    | 7        | 4342    |
| N02     | Nu   | W02  | NuW2  | 0.000    | 7        | 3925    |
| N03     | Nu   | W02  | NuW2  | 2.326    | 8        | 4594    |
| N04     | Nu   | W02  | NuW2  | 0.000    | 8        | 3807    |
| N05     | Nu   | W02  | NuW2  | 0.000    | 8        | 4511    |
| N06     | Nu   | W02  | NuW2  | 4.541    | 7        | 3758    |
| N07     | Nu   | W02  | NuW2  | 1.535    | 7.5      | 3830    |
| N08     | Nu   | W02  | NuW2  | 3.343    | 8        | 3790    |
| N09     | Nu   | W02  | NuW2  | 1.812    | 5        | 4275    |
| N10     | Nu   | W02  | NuW2  | 0.000    | 4        | 3834    |
| P01     | pH   | W02  | pHW2  | 2.980    | 6        | 3824    |
| P02     | pH   | W02  | pHW2  | 4.053    | 5.5      | 3733    |
| P03     | pH   | W02  | pHW2  | 1.223    | 6.5      | 4269    |
| P04     | pH   | W02  | pHW2  | 0.000    | 5        | 3833    |
| P05     | pH   | W02  | pHW2  | 0.000    | 6        | 4783    |
| P06     | pH   | W02  | pHW2  | 1.908    | 6        | 3835    |
| P07     | pH   | W02  | pHW2  | 0.000    | 6        | 3919    |
| P08     | pH   | W02  | pHW2  | 0.000    | 5        | 3814    |
| P09     | pH   | W02  | pHW2  | 0.000    | 5.5      | 3687    |
| P10     | pH   | W02  | pHW2  | 0.000    | 6        | 3899    |
| F01     | Fa   | W02  | FaW2  | 2.605    | 2        | 1939    |
| F02     | Fa   | W02  | FaW2  | 2.416    | 2        | 1208    |
| F03     | Fa   | W02  | FaW2  | 0.000    | 2        | 1740    |
| F04     | Fa   | W02  | FaW2  | 2.721    | 0.5      | 806     |
| F05     | Fa   | W02  | FaW2  | 2.346    | 0        | 889     |
| F06     | Fa   | W02  | FaW2  | 3.303    | 1.5      | 825     |
| F07     | Fa   | W02  | FaW2  | 0.000    | 1.5      | 1332    |
| F08     | Fa   | W02  | FaW2  | 2.264    | 1.5      | 1329    |
| F09     | Fa   | W02  | FaW2  | 1.533    | 1        | 676     |
| F10     | Fa   | W02  | FaW2  | 0.000    | 0.5      | 1023    |
| H01     | He   | W02  | HeW2  | 2.612    | 1        | 936     |
| H02     | He   | W02  | HeW2  | 0.000    | 3        | 3836    |
| H03     | He   | W02  | HeW2  | 1.435    | 2        | 2736    |
| H04     | He   | W02  | HeW2  | 2.722    | 2        | 2964    |
| H05     | He   | W02  | HeW2  | 2.354    | 3        | 3715    |
| H06     | He   | W02  | HeW2  | 0.000    | 4        | 3769    |
| H07     | He   | W02  | HeW2  | 2.426    | 2        | 3945    |
| H08     | He   | W02  | HeW2  | 3.017    | 2        | 3547    |
| H09     | He   | W02  | HeW2  | 1.539    | 0.5      | 2400    |
| H10     | He   | W02  | HeW2  | 0.000    | 4        | 3762    |
| N01     | Nu   | W05  | NuW5  | 3.601    | 2        | 3308    |
| N02     | Nu   | W05  | NuW5  | 0.000    | 3        | 3474    |
| N03     | Nu   | W05  | NuW5  | 3.410    | 3        | 3403    |
| N04     | Nu   | W05  | NuW5  | 2.740    | 3        | 3297    |
| N05     | Nu   | W05  | NuW5  | 4.016    | 2.5      | 2853    |

|     |    |     |      |       |     |      |
|-----|----|-----|------|-------|-----|------|
| N06 | Nu | W05 | NuW5 | 3.046 | 2   | 1990 |
| N07 | Nu | W05 | NuW5 | 3.260 | 2   | 2955 |
| N08 | Nu | W05 | NuW5 | 3.228 | 3   | 3251 |
| N09 | Nu | W05 | NuW5 | 2.509 | 2   | 3177 |
| N10 | Nu | W05 | NuW5 | 3.755 | 2   | 2421 |
| P01 | pH | W05 | pHW5 | 1.889 | 2   | 2487 |
| P02 | pH | W05 | pHW5 | 3.103 | 1   | 2086 |
| P03 | pH | W05 | pHW5 | 3.020 | 3.5 | 2810 |
| P04 | pH | W05 | pHW5 | 3.549 | 2   | 2029 |
| P05 | pH | W05 | pHW5 | 3.393 | 2.5 | 3056 |
| P06 | pH | W05 | pHW5 | 2.108 | 2   | 1957 |
| P07 | pH | W05 | pHW5 | 3.082 | 2   | 2752 |
| P08 | pH | W05 | pHW5 | 3.123 | 4   | 3001 |
| P09 | pH | W05 | pHW5 | 2.823 | 3   | 3560 |
| P10 | pH | W05 | pHW5 | 3.070 | 3   | 2940 |
| F01 | Fa | W05 | FaW5 | 1.250 | 3   | 3541 |
| F02 | Fa | W05 | FaW5 | 0.000 | 3.5 | 3570 |
| F03 | Fa | W05 | FaW5 | 3.186 | 3   | 3718 |
| F04 | Fa | W05 | FaW5 | 1.290 | 0   | 3570 |
| F05 | Fa | W05 | FaW5 | 1.302 | 0   | 3537 |
| F06 | Fa | W05 | FaW5 | 1.672 | 3.5 | 3498 |
| F07 | Fa | W05 | FaW5 | 1.735 | 3   | 3337 |
| F08 | Fa | W05 | FaW5 | 0.798 | 2   | 1981 |
| F09 | Fa | W05 | FaW5 | 1.880 | 3.5 | 3569 |
| F10 | Fa | W05 | FaW5 | 2.377 | 2   | 1927 |
| H01 | He | W05 | HeW5 | 2.574 | 3   | 4198 |
| H02 | He | W05 | HeW5 | 0.000 | 2   | 3890 |
| H03 | He | W05 | HeW5 | 0.000 | 4   | 3867 |
| H04 | He | W05 | HeW5 | 3.896 | 2   | 3695 |
| H05 | He | W05 | HeW5 | 3.060 | 3.5 | 3658 |
| H06 | He | W05 | HeW5 | 2.275 | 1   | 2258 |
| H07 | He | W05 | HeW5 | 3.955 | 1.5 | 2515 |
| H08 | He | W05 | HeW5 | 3.629 | 3   | 3512 |
| H09 | He | W05 | HeW5 | 3.629 | 2   | 3172 |
| H10 | He | W05 | HeW5 | 4.081 | 2   | 2484 |
| N01 | Nu | W08 | NuW8 | 3.023 | 4   | 3995 |
| N02 | Nu | W08 | NuW8 | 0.000 | 3.5 | 3864 |
| N03 | Nu | W08 | NuW8 | 4.196 | 3   | 4286 |
| N04 | Nu | W08 | NuW8 | 3.300 | 4   | 3770 |
| N05 | Nu | W08 | NuW8 | 3.246 | 3   | 3897 |
| N06 | Nu | W08 | NuW8 | 2.599 | 2   | 3605 |
| N07 | Nu | W08 | NuW8 | 2.907 | 2.5 | 3855 |
| N08 | Nu | W08 | NuW8 | 3.092 | 2.5 | 3697 |
| N09 | Nu | W08 | NuW8 | 3.058 | 2.5 | 3815 |
| N10 | Nu | W08 | NuW8 | 3.502 | 4   | 3685 |
| P01 | pH | W08 | pHW8 | 0.000 | 3   | 3691 |

|     |    |     |       |       |     |      |
|-----|----|-----|-------|-------|-----|------|
| P02 | pH | W08 | pHW8  | 0.000 | 4   | 4031 |
| P03 | pH | W08 | pHW8  | 3.295 | 3.5 | 3691 |
| P04 | pH | W08 | pHW8  | 3.342 | 3.5 | 4508 |
| P05 | pH | W08 | pHW8  | 3.177 | 4.5 | 3657 |
| P06 | pH | W08 | pHW8  | 0.000 | 2.5 | 3515 |
| P07 | pH | W08 | pHW8  | 3.162 | 3   | 3450 |
| P08 | pH | W08 | pHW8  | 3.794 | 4.5 | 4144 |
| P09 | pH | W08 | pHW8  | 2.706 | 5   | 5380 |
| P10 | pH | W08 | pHW8  | 3.206 | 4.5 | 3873 |
| F01 | Fa | W08 | FaW8  | 2.925 | 3.5 | 4021 |
| F02 | Fa | W08 | FaW8  | 0.000 | 3.5 | 3982 |
| F03 | Fa | W08 | FaW8  | 3.138 | 4   | 4090 |
| F04 | Fa | W08 | FaW8  | 2.780 | 3.5 | 3751 |
| F05 | Fa | W08 | FaW8  | 2.115 | 3.5 | 3691 |
| F06 | Fa | W08 | FaW8  | 2.624 | 4   | 3921 |
| F07 | Fa | W08 | FaW8  | 2.920 | 3   | 3756 |
| F08 | Fa | W08 | FaW8  | 1.600 | 2.5 | 3923 |
| F09 | Fa | W08 | FaW8  | 3.133 | 4   | 3711 |
| F10 | Fa | W08 | FaW8  | 3.060 | 3   | 3927 |
| H01 | He | W08 | HeW8  | 2.984 | 3.5 | 4072 |
| H02 | He | W08 | HeW8  | 0.000 | 3.5 | 4196 |
| H03 | He | W08 | HeW8  | 2.846 | 4.5 | 4259 |
| H04 | He | W08 | HeW8  | 2.177 | 4   | 4367 |
| H05 | He | W08 | HeW8  | 2.690 | 4.5 | 3974 |
| H06 | He | W08 | HeW8  | 2.973 | 3.5 | 3786 |
| H07 | He | W08 | HeW8  | 1.714 | 4   | 3748 |
| H08 | He | W08 | HeW8  | 2.894 | 4.5 | 4142 |
| H09 | He | W08 | HeW8  | 3.177 | 4   | 3934 |
| H10 | He | W08 | HeW8  | 3.103 | 4   | 5380 |
| N01 | Nu | W11 | NuW11 | 2.734 | 6.5 | 6513 |
| N02 | Nu | W11 | NuW11 | 2.281 | 6.5 | 6841 |
| N03 | Nu | W11 | NuW11 | 2.979 | 5.5 | 6716 |
| N04 | Nu | W11 | NuW11 | 2.800 | 6   | 7107 |
| N05 | Nu | W11 | NuW11 | 3.444 | 4.5 | 6469 |
| N06 | Nu | W11 | NuW11 | 2.686 | 4.5 | 5139 |
| N07 | Nu | W11 | NuW11 | 2.714 | 6   | 6869 |
| N08 | Nu | W11 | NuW11 | 2.345 | 5   | 6509 |
| N09 | Nu | W11 | NuW11 | 2.591 | 4.5 | 5948 |
| N10 | Nu | W11 | NuW11 | 3.129 | 6.5 | 6683 |
| P01 | pH | W11 | pHW11 | 2.697 | 5   | 5480 |
| P02 | pH | W11 | pHW11 | 2.281 | 6.5 | 6568 |
| P03 | pH | W11 | pHW11 | 2.979 | 6   | 6575 |
| P04 | pH | W11 | pHW11 | 2.800 | 7   | 7087 |
| P05 | pH | W11 | pHW11 | 3.444 | 6.5 | 6858 |
| P06 | pH | W11 | pHW11 | 2.686 | 4   | 3200 |
| P07 | pH | W11 | pHW11 | 2.714 | 5   | 4336 |

|     |    |     |       |       |     |      |
|-----|----|-----|-------|-------|-----|------|
| P08 | pH | W11 | pHW11 | 2.426 | 8   | 7381 |
| P09 | pH | W11 | pHW11 | 2.492 | 7   | 6896 |
| P10 | pH | W11 | pHW11 | 3.129 | 5.5 | 6286 |
| F01 | Fa | W11 | FaW11 | 2.954 | 6   | 6018 |
| F02 | Fa | W11 | FaW11 | 1.844 | 5   | 6147 |
| F03 | Fa | W11 | FaW11 | 2.236 | 5.5 | 6388 |
| F04 | Fa | W11 | FaW11 | 2.676 | 6   | 5853 |
| F05 | Fa | W11 | FaW11 | 2.673 | 5.5 | 5794 |
| F06 | Fa | W11 | FaW11 | 2.945 | 7   | 6501 |
| F07 | Fa | W11 | FaW11 | 4.169 | 5   | 5267 |
| F08 | Fa | W11 | FaW11 | 0.000 | 4.5 | 5306 |
| F09 | Fa | W11 | FaW11 | 2.747 | 6.5 | 7184 |
| F10 | Fa | W11 | FaW11 | 0.000 | 4   | 4329 |
| H01 | He | W11 | HeW11 | 0.000 | 5   | 7002 |
| H02 | He | W11 | HeW11 | 0.000 | 5   | 5415 |
| H03 | He | W11 | HeW11 | 2.566 | 6   | 7181 |
| H04 | He | W11 | HeW11 | 0.000 | 5   | 6044 |
| H05 | He | W11 | HeW11 | 4.592 | 6   | 7255 |
| H06 | He | W11 | HeW11 | 3.360 | 5   | 7009 |
| H07 | He | W11 | HeW11 | 2.997 | 5.5 | 7097 |
| H08 | He | W11 | HeW11 | 0.000 | 5.5 | 6186 |
| H09 | He | W11 | HeW11 | 3.336 | 6.5 | 6287 |
| H10 | He | W11 | HeW11 | 0.000 | 6   | 7203 |
| N01 | Nu | W14 | NuW14 | 0.000 |     |      |
| N02 | Nu | W14 | NuW14 | 2.877 |     |      |
| N03 | Nu | W14 | NuW14 | 3.193 |     |      |
| N04 | Nu | W14 | NuW14 | 3.120 |     |      |
| N05 | Nu | W14 | NuW14 | 4.432 |     |      |
| N06 | Nu | W14 | NuW14 | 2.931 |     |      |
| N07 | Nu | W14 | NuW14 | 3.027 |     |      |
| N08 | Nu | W14 | NuW14 | 2.783 |     |      |
| N09 | Nu | W14 | NuW14 | 2.889 |     |      |
| N10 | Nu | W14 | NuW14 | 3.301 |     |      |
| P01 | pH | W14 | pHW14 | 0.000 |     |      |
| P02 | pH | W14 | pHW14 | 0.000 |     |      |
| P03 | pH | W14 | pHW14 | 2.985 |     |      |
| P04 | pH | W14 | pHW14 | 2.894 |     |      |
| P05 | pH | W14 | pHW14 | 3.567 |     |      |
| P06 | pH | W14 | pHW14 | 0.000 |     |      |
| P07 | pH | W14 | pHW14 | 2.569 |     |      |
| P08 | pH | W14 | pHW14 | 2.349 |     |      |
| P09 | pH | W14 | pHW14 | 2.610 |     |      |
| P10 | pH | W14 | pHW14 | 2.373 |     |      |
| F01 | Fa | W14 | FaW14 | 2.676 |     |      |
| F02 | Fa | W14 | FaW14 | 2.127 |     |      |
| F03 | Fa | W14 | FaW14 | 2.841 |     |      |

|     |    |     |       |       |     |       |
|-----|----|-----|-------|-------|-----|-------|
| F04 | Fa | W14 | FaW14 | 2.875 |     |       |
| F05 | Fa | W14 | FaW14 | 0.000 |     |       |
| F06 | Fa | W14 | FaW14 | 2.915 |     |       |
| F07 | Fa | W14 | FaW14 | 3.426 |     |       |
| F08 | Fa | W14 | FaW14 | 1.958 |     |       |
| F09 | Fa | W14 | FaW14 | 2.557 |     |       |
| F10 | Fa | W14 | FaW14 | 0.000 |     |       |
| H01 | He | W14 | HeW14 | 2.312 |     |       |
| H02 | He | W14 | HeW14 | 1.998 |     |       |
| H03 | He | W14 | HeW14 | 2.287 |     |       |
| H04 | He | W14 | HeW14 | 0.000 |     |       |
| H05 | He | W14 | HeW14 | 0.000 |     |       |
| H06 | He | W14 | HeW14 | 2.804 |     |       |
| H07 | He | W14 | HeW14 | 2.516 |     |       |
| H08 | He | W14 | HeW14 | 0.000 |     |       |
| H09 | He | W14 | HeW14 | 3.408 |     |       |
| H10 | He | W14 | HeW14 | 2.968 |     |       |
| N01 | Nu | W17 | NuW17 | 0.000 | 5   | 8394  |
| N02 | Nu | W17 | NuW17 | 3.329 | 6   | 7309  |
| N03 | Nu | W17 | NuW17 | 0.000 | 5   | 8471  |
| N04 | Nu | W17 | NuW17 | 3.595 | 7   | 9479  |
| N05 | Nu | W17 | NuW17 | 2.218 | 4.5 | 7968  |
| N06 | Nu | W17 | NuW17 | 3.313 | 4.5 | 8568  |
| N07 | Nu | W17 | NuW17 | 2.690 | 5.5 | 11057 |
| N08 | Nu | W17 | NuW17 | 2.885 | 4.5 | 9918  |
| N09 | Nu | W17 | NuW17 | 2.703 | 5   | 9357  |
| N10 | Nu | W17 | NuW17 | 3.089 | 5   | 7371  |
| P01 | pH | W17 | pHW17 | 2.656 | 5   | 8357  |
| P02 | pH | W17 | pHW17 | 0.000 | 6   | 8755  |
| P03 | pH | W17 | pHW17 | 0.000 | 7   | 11291 |
| P04 | pH | W17 | pHW17 | 2.673 | 7   | 12809 |
| P05 | pH | W17 | pHW17 | 2.862 | 6   | 7359  |
| P06 | pH | W17 | pHW17 | 0.000 | 4.5 | 6792  |
| P07 | pH | W17 | pHW17 | 2.813 | 5.5 | 6395  |
| P08 | pH | W17 | pHW17 | 3.040 | 7.5 | 9545  |
| P09 | pH | W17 | pHW17 | 2.715 | 6.5 | 11371 |
| P10 | pH | W17 | pHW17 | 2.871 | 6   | 10179 |
| F01 | Fa | W17 | FaW17 | 0.000 | 5   | 4101  |
| F02 | Fa | W17 | FaW17 | 0.000 | 5   | 7078  |
| F03 | Fa | W17 | FaW17 | 2.888 | 4.5 | 7633  |
| F04 | Fa | W17 | FaW17 | 2.960 | 4   | 6039  |
| F05 | Fa | W17 | FaW17 | 2.833 | 5   | 6608  |
| F06 | Fa | W17 | FaW17 | 3.502 | 5   | 5642  |
| F07 | Fa | W17 | FaW17 | 3.510 | 4   | 4461  |
| F08 | Fa | W17 | FaW17 | 0.000 | 3   | 4040  |
| F09 | Fa | W17 | FaW17 | 2.742 | 5   | 6489  |

|     |    |     |       |       |     |      |
|-----|----|-----|-------|-------|-----|------|
| F10 | Fa | W17 | FaW17 | 0.000 | 3   | 2760 |
| H01 | He | W17 | HeW17 | 0.000 | 5.5 | 6953 |
| H02 | He | W17 | HeW17 | 0.000 | 4.5 | 4334 |
| H03 | He | W17 | HeW17 | 0.000 | 5.5 | 8421 |
| H04 | He | W17 | HeW17 | 2.621 | 4.5 | 5389 |
| H05 | He | W17 | HeW17 | 0.000 | 6.5 | 7987 |
| H06 | He | W17 | HeW17 | 0.000 | 5.5 | 7462 |
| H07 | He | W17 | HeW17 | 0.000 | 5.5 | 8792 |
| H08 | He | W17 | HeW17 | 0.000 | 6   | 5333 |
| H09 | He | W17 | HeW17 | 3.818 | 6.5 | 8196 |
| H10 | He | W17 | HeW17 | 2.328 | 5.5 | 9929 |
| N01 | Nu | W20 | NuW20 | 0.000 |     |      |
| N02 | Nu | W20 | NuW20 | 2.770 |     |      |
| N03 | Nu | W20 | NuW20 | 0.000 |     |      |
| N04 | Nu | W20 | NuW20 | 3.326 |     |      |
| N05 | Nu | W20 | NuW20 | 2.354 |     |      |
| N06 | Nu | W20 | NuW20 | 3.549 |     |      |
| N07 | Nu | W20 | NuW20 | 3.061 |     |      |
| N08 | Nu | W20 | NuW20 | 3.198 |     |      |
| N09 | Nu | W20 | NuW20 | 3.071 |     |      |
| N10 | Nu | W20 | NuW20 | 2.795 |     |      |
| P01 | pH | W20 | pHW20 | 2.853 |     |      |
| P02 | pH | W20 | pHW20 | 0.000 |     |      |
| P03 | pH | W20 | pHW20 | 2.819 |     |      |
| P04 | pH | W20 | pHW20 | 2.987 |     |      |
| P05 | pH | W20 | pHW20 | 3.309 |     |      |
| P06 | pH | W20 | pHW20 | 0.000 |     |      |
| P07 | pH | W20 | pHW20 | 2.977 |     |      |
| P08 | pH | W20 | pHW20 | 3.037 |     |      |
| P09 | pH | W20 | pHW20 | 2.953 |     |      |
| P10 | pH | W20 | pHW20 | 2.598 |     |      |
| F01 | Fa | W20 | FaW20 | 3.099 |     |      |
| F02 | Fa | W20 | FaW20 | 2.419 |     |      |
| F03 | Fa | W20 | FaW20 | 2.657 |     |      |
| F04 | Fa | W20 | FaW20 | 3.493 |     |      |
| F05 | Fa | W20 | FaW20 | 2.812 |     |      |
| F06 | Fa | W20 | FaW20 | 3.022 |     |      |
| F07 | Fa | W20 | FaW20 | 3.552 |     |      |
| F08 | Fa | W20 | FaW20 | 3.616 |     |      |
| F09 | Fa | W20 | FaW20 | 2.689 |     |      |
| F10 | Fa | W20 | FaW20 | 0.000 |     |      |
| H01 | He | W20 | HeW20 | 0.000 |     |      |
| H02 | He | W20 | HeW20 | 0.000 |     |      |
| H03 | He | W20 | HeW20 | 0.000 |     |      |
| H04 | He | W20 | HeW20 | 0.000 |     |      |
| H05 | He | W20 | HeW20 | 2.221 |     |      |

|     |    |     |       |       |     |       |
|-----|----|-----|-------|-------|-----|-------|
| H06 | He | W20 | HeW20 | 2.957 |     |       |
| H07 | He | W20 | HeW20 | 2.848 |     |       |
| H08 | He | W20 | HeW20 | 0.000 |     |       |
| H09 | He | W20 | HeW20 | 3.443 |     |       |
| H10 | He | W20 | HeW20 | 2.835 |     |       |
| N01 | Nu | W24 | NuW24 | 2.792 | 4.5 | 4221  |
| N02 | Nu | W24 | NuW24 | 3.508 | 4.5 | 2107  |
| N03 | Nu | W24 | NuW24 | 0.000 | 4   | 2029  |
| N04 | Nu | W24 | NuW24 | 3.973 | 4   | 4390  |
| N05 | Nu | W24 | NuW24 | 2.869 | 3   | 2399  |
| N06 | Nu | W24 | NuW24 | 4.146 | 3.5 | 3534  |
| N07 | Nu | W24 | NuW24 | 3.947 | 5   | 11297 |
| N08 | Nu | W24 | NuW24 | 3.540 | 4.5 | 4780  |
| N09 | Nu | W24 | NuW24 | 3.684 | 3.5 | 3327  |
| N10 | Nu | W24 | NuW24 | 3.680 | 3.5 | 1276  |
| P01 | pH | W24 | pHW24 | 0.000 | 5   | 3991  |
| P02 | pH | W24 | pHW24 | 0.000 | 6.5 | 6455  |
| P03 | pH | W24 | pHW24 | 2.823 | 5   | 6689  |
| P04 | pH | W24 | pHW24 | 3.020 | 6.5 | 10722 |
| P05 | pH | W24 | pHW24 | 2.987 | 4.5 | 4988  |
| P06 | pH | W24 | pHW24 | 2.685 | 6   | 6350  |
| P07 | pH | W24 | pHW24 | 3.204 | 5.5 | 4007  |
| P08 | pH | W24 | pHW24 | 2.308 | 6   | 5858  |
| P09 | pH | W24 | pHW24 | 3.047 | 7   | 11080 |
| P10 | pH | W24 | pHW24 | 2.353 | 5   | 4013  |
| F01 | Fa | W24 | FaW24 | 2.974 | 4.5 | 7106  |
| F02 | Fa | W24 | FaW24 | NA    | 4   | 3902  |
| F03 | Fa | W24 | FaW24 | 3.565 | 4   | 4306  |
| F04 | Fa | W24 | FaW24 | 3.129 | 3   | 1395  |
| F05 | Fa | W24 | FaW24 | 3.399 | 4.5 | 7793  |
| F06 | Fa | W24 | FaW24 | 2.926 | 3.5 | 2525  |
| F07 | Fa | W24 | FaW24 | 3.136 | 3.5 | 2722  |
| F08 | Fa | W24 | FaW24 | 3.390 | 2   | 1245  |
| F09 | Fa | W24 | FaW24 | 2.785 | 4.5 | 9788  |
| F10 | Fa | W24 | FaW24 | 0.000 | 2   | 429   |
| H01 | He | W24 | HeW24 | 2.819 | 4   | 7591  |
| H02 | He | W24 | HeW24 | 0.000 | 4   | 4500  |
| H03 | He | W24 | HeW24 | 0.000 | 4   | 4089  |
| H04 | He | W24 | HeW24 | 0.000 | 3.5 | 3830  |
| H05 | He | W24 | HeW24 | 3.175 | 5   | 11720 |
| H06 | He | W24 | HeW24 | 3.200 | 4.5 | 9513  |
| H07 | He | W24 | HeW24 | NA    | 4.5 | 5528  |
| H08 | He | W24 | HeW24 | 2.425 | 4   | 3493  |
| H09 | He | W24 | HeW24 | 3.237 | 5   | 9412  |
| H10 | He | W24 | HeW24 | 2.680 | 4.5 | 7379  |
| N01 | Nu | W26 | NuW26 | 0.000 |     |       |

|     |    |     |       |       |     |       |
|-----|----|-----|-------|-------|-----|-------|
| N02 | Nu | W26 | NuW26 | 3.231 |     |       |
| N03 | Nu | W26 | NuW26 | 0.000 |     |       |
| N04 | Nu | W26 | NuW26 | 3.216 |     |       |
| N05 | Nu | W26 | NuW26 | 0.000 |     |       |
| N06 | Nu | W26 | NuW26 | 3.689 |     |       |
| N07 | Nu | W26 | NuW26 | 2.971 |     |       |
| N08 | Nu | W26 | NuW26 | 3.093 |     |       |
| N09 | Nu | W26 | NuW26 | 3.802 |     |       |
| N10 | Nu | W26 | NuW26 | 3.399 |     |       |
| P01 | pH | W26 | pHW26 | 0.000 |     |       |
| P02 | pH | W26 | pHW26 | 0.000 |     |       |
| P03 | pH | W26 | pHW26 | 2.617 |     |       |
| P04 | pH | W26 | pHW26 | NA    |     |       |
| P05 | pH | W26 | pHW26 | 3.716 |     |       |
| P06 | pH | W26 | pHW26 | NA    |     |       |
| P07 | pH | W26 | pHW26 | 3.446 |     |       |
| P08 | pH | W26 | pHW26 | 2.585 |     |       |
| P09 | pH | W26 | pHW26 | 3.149 |     |       |
| P10 | pH | W26 | pHW26 | 2.735 |     |       |
| F01 | Fa | W26 | FaW26 | 3.415 |     |       |
| F02 | Fa | W26 | FaW26 | NA    |     |       |
| F03 | Fa | W26 | FaW26 | 3.732 |     |       |
| F04 | Fa | W26 | FaW26 | 3.237 |     |       |
| F05 | Fa | W26 | FaW26 | 3.059 |     |       |
| F06 | Fa | W26 | FaW26 | 3.059 |     |       |
| F07 | Fa | W26 | FaW26 | 3.156 |     |       |
| F08 | Fa | W26 | FaW26 | 2.891 |     |       |
| F09 | Fa | W26 | FaW26 | NA    |     |       |
| F10 | Fa | W26 | FaW26 | 0.000 |     |       |
| H01 | He | W26 | HeW26 | 3.055 |     |       |
| H02 | He | W26 | HeW26 | 0.000 |     |       |
| H03 | He | W26 | HeW26 | 0.000 |     |       |
| H04 | He | W26 | HeW26 | 0.000 |     |       |
| H05 | He | W26 | HeW26 | 2.925 |     |       |
| H06 | He | W26 | HeW26 | 0.000 |     |       |
| H07 | He | W26 | HeW26 | NA    |     |       |
| H08 | He | W26 | HeW26 | 0.000 |     |       |
| H09 | He | W26 | HeW26 | 3.041 |     |       |
| H10 | He | W26 | HeW26 | 2.438 |     |       |
| N01 | Nu | W29 | NuW29 | 0.000 | 5   | 5540  |
| N02 | Nu | W29 | NuW29 | 3.660 | 5   | 4049  |
| N03 | Nu | W29 | NuW29 | 0.000 | 4   | 3642  |
| N04 | Nu | W29 | NuW29 | 3.035 | 6   | 10695 |
| N05 | Nu | W29 | NuW29 | 2.201 | 3.5 | 2208  |
| N06 | Nu | W29 | NuW29 | 3.601 | 4   | 6623  |
| N07 | Nu | W29 | NuW29 | 3.392 | 5.5 | 13795 |



|     |    |     |       |       |     |       |
|-----|----|-----|-------|-------|-----|-------|
| N08 | Nu | W29 | NuW29 | 3.640 | 5   | 7450  |
| N09 | Nu | W29 | NuW29 | 2.723 | 5   | 6847  |
| N10 | Nu | W29 | NuW29 | 2.927 | 4   | 2267  |
| P01 | pH | W29 | pHW29 | 2.446 | 4.5 | 2316  |
| P02 | pH | W29 | pHW29 | NA    | 5.5 | 7053  |
| P03 | pH | W29 | pHW29 | 2.589 | 5.5 | 6188  |
| P04 | pH | W29 | pHW29 | NA    | 6.5 | 10418 |
| P05 | pH | W29 | pHW29 | 2.766 | 4.5 | 5047  |
| P06 | pH | W29 | pHW29 | NA    | 4.5 | 5010  |
| P07 | pH | W29 | pHW29 | 2.815 | 4.5 | 1932  |
| P08 | pH | W29 | pHW29 | 2.753 | 5   | 5454  |
| P09 | pH | W29 | pHW29 | 2.678 | 6   | 9446  |
| P10 | pH | W29 | pHW29 | 2.905 | 4   | 2815  |
| F01 | Fa | W29 | FaW29 | 2.711 | 4.5 | 6598  |
| F02 | Fa | W29 | FaW29 | 2.570 | 4   | 6510  |
| F03 | Fa | W29 | FaW29 | 2.923 | 4   | 4828  |
| F04 | Fa | W29 | FaW29 | NA    | 4   | 2869  |
| F05 | Fa | W29 | FaW29 | 3.109 | 4.5 | 4021  |
| F06 | Fa | W29 | FaW29 | 3.161 | 4   | 3140  |
| F07 | Fa | W29 | FaW29 | 3.388 | 3.5 | 3381  |
| F08 | Fa | W29 | FaW29 | 2.735 | 3   | 1466  |
| F09 | Fa | W29 | FaW29 | NA    | 4.5 | 7414  |
| F10 | Fa | W29 | FaW29 | 0.000 | 2   | 345   |
| H01 | He | W29 | HeW29 | 3.061 | 5   | 8510  |
| H02 | He | W29 | HeW29 | 0.000 | 4.5 | 3001  |
| H03 | He | W29 | HeW29 | 0.000 | 4.5 | 4531  |
| H04 | He | W29 | HeW29 | 0.000 | 4   | 3875  |
| H05 | He | W29 | HeW29 | 2.265 | 6.5 | 11793 |
| H06 | He | W29 | HeW29 | 2.322 | 6   | 15080 |
| H07 | He | W29 | HeW29 | 2.663 | 5.5 | 5896  |
| H08 | He | W29 | HeW29 | 0.000 | 4.5 | 2812  |
| H09 | He | W29 | HeW29 | 2.676 | 6   | 9716  |
| H10 | He | W29 | HeW29 | 2.201 | 4.5 | 11368 |
| N01 | Nu | W32 | NuW32 | 0.000 |     |       |
| N02 | Nu | W32 | NuW32 | 3.871 |     |       |
| N03 | Nu | W32 | NuW32 | 0.000 |     |       |
| N04 | Nu | W32 | NuW32 | 4.243 |     |       |
| N05 | Nu | W32 | NuW32 | 2.905 |     |       |
| N06 | Nu | W32 | NuW32 | 4.296 |     |       |
| N07 | Nu | W32 | NuW32 | NA    |     |       |
| N08 | Nu | W32 | NuW32 | 3.493 |     |       |
| N09 | Nu | W32 | NuW32 | 4.440 |     |       |
| N10 | Nu | W32 | NuW32 | 2.851 |     |       |
| P01 | pH | W32 | pHW32 | NA    |     |       |
| P02 | pH | W32 | pHW32 | NA    |     |       |
| P03 | pH | W32 | pHW32 | NA    |     |       |

|     |    |     |       |       |     |       |
|-----|----|-----|-------|-------|-----|-------|
| P04 | pH | W32 | pHW32 | NA    |     |       |
| P05 | pH | W32 | pHW32 | 0.000 |     |       |
| P06 | pH | W32 | pHW32 | NA    |     |       |
| P07 | pH | W32 | pHW32 | 3.773 |     |       |
| P08 | pH | W32 | pHW32 | NA    |     |       |
| P09 | pH | W32 | pHW32 | 2.775 |     |       |
| P10 | pH | W32 | pHW32 | 3.208 |     |       |
| F01 | Fa | W32 | FaW32 | 3.274 |     |       |
| F02 | Fa | W32 | FaW32 | 2.068 |     |       |
| F03 | Fa | W32 | FaW32 | 3.598 |     |       |
| F04 | Fa | W32 | FaW32 | NA    |     |       |
| F05 | Fa | W32 | FaW32 | 3.029 |     |       |
| F06 | Fa | W32 | FaW32 | 3.599 |     |       |
| F07 | Fa | W32 | FaW32 | 3.116 |     |       |
| F08 | Fa | W32 | FaW32 | 2.942 |     |       |
| F09 | Fa | W32 | FaW32 | NA    |     |       |
| F10 | Fa | W32 | FaW32 | 0.000 |     |       |
| H01 | He | W32 | HeW32 | 2.336 |     |       |
| H02 | He | W32 | HeW32 | 0.000 |     |       |
| H03 | He | W32 | HeW32 | 0.000 |     |       |
| H04 | He | W32 | HeW32 | 0.000 |     |       |
| H05 | He | W32 | HeW32 | 3.416 |     |       |
| H06 | He | W32 | HeW32 | 2.622 |     |       |
| H07 | He | W32 | HeW32 | 2.730 |     |       |
| H08 | He | W32 | HeW32 | 0.000 |     |       |
| H09 | He | W32 | HeW32 | 3.381 |     |       |
| H10 | He | W32 | HeW32 | 2.897 |     |       |
| N01 | Nu | W35 | NuW35 | 0.000 | 4.5 | 6188  |
| N02 | Nu | W35 | NuW35 | 3.141 | 5   | 6395  |
| N03 | Nu | W35 | NuW35 | 0.000 | 3.5 | 2131  |
| N04 | Nu | W35 | NuW35 | 3.595 | 6   | 12336 |
| N05 | Nu | W35 | NuW35 | 0.000 | 3   | 1990  |
| N06 | Nu | W35 | NuW35 | 2.517 | 3.5 | 3830  |
| N07 | Nu | W35 | NuW35 | NA    | 6.5 | 16473 |
| N08 | Nu | W35 | NuW35 | 0.000 | 5.5 | 8028  |
| N09 | Nu | W35 | NuW35 | 2.100 | 5   | 7623  |
| N10 | Nu | W35 | NuW35 | NA    | 4.5 | 2465  |
| P01 | pH | W35 | pHW35 | NA    | 4.5 | 3530  |
| P02 | pH | W35 | pHW35 | NA    | 5   | 4756  |
| P03 | pH | W35 | pHW35 | NA    | 5   | 5553  |
| P04 | pH | W35 | pHW35 | NA    | 6.5 | 11315 |
| P05 | pH | W35 | pHW35 | 3.413 | 5.5 | 7108  |
| P06 | pH | W35 | pHW35 | NA    | 4   | 2834  |
| P07 | pH | W35 | pHW35 | 3.681 | 4   | 2372  |
| P08 | pH | W35 | pHW35 | NA    | 5   | 5612  |
| P09 | pH | W35 | pHW35 | 2.474 | 7   | 13364 |

|     |    |     |       |       |     |       |
|-----|----|-----|-------|-------|-----|-------|
| P10 | pH | W35 | pHW35 | 2.528 | 4.5 | 4294  |
| F01 | Fa | W35 | FaW35 | 2.871 | 4.5 | 10567 |
| F02 | Fa | W35 | FaW35 | NA    | 4   | 6779  |
| F03 | Fa | W35 | FaW35 | 2.876 | 4   | 4502  |
| F04 | Fa | W35 | FaW35 | 2.168 | 3.5 | 2634  |
| F05 | Fa | W35 | FaW35 | 2.850 | 4   | 5819  |
| F06 | Fa | W35 | FaW35 | 3.212 | 4   | 3349  |
| F07 | Fa | W35 | FaW35 | 3.231 | 4   | 3984  |
| F08 | Fa | W35 | FaW35 | 3.082 | 3   | 1982  |
| F09 | Fa | W35 | FaW35 | 0.000 | 4   | 8010  |
| F10 | Fa | W35 | FaW35 | 0.000 | 2   | 445   |
| H01 | He | W35 | HeW35 | 2.732 | 5   | 8762  |
| H02 | He | W35 | HeW35 | 0.000 | 3.5 | 2062  |
| H03 | He | W35 | HeW35 | 0.000 | 5   | 4376  |
| H04 | He | W35 | HeW35 | 0.000 | 4   | 3457  |
| H05 | He | W35 | HeW35 | 2.582 | 6.5 | 10079 |
| H06 | He | W35 | HeW35 | 2.139 | 6.5 | 13518 |
| H07 | He | W35 | HeW35 | 3.142 | 5   | 8467  |
| H08 | He | W35 | HeW35 | 0.000 | 4   | 2028  |
| H09 | He | W35 | HeW35 | 2.557 | 6.5 | 12563 |
| H10 | He | W35 | HeW35 | 2.192 | 4.5 | 11673 |
| N01 | Nu | W38 | NuW38 | 0.000 |     |       |
| N02 | Nu | W38 | NuW38 | 3.804 |     |       |
| N03 | Nu | W38 | NuW38 | 0.000 |     |       |
| N04 | Nu | W38 | NuW38 | 3.968 |     |       |
| N05 | Nu | W38 | NuW38 | 2.182 |     |       |
| N06 | Nu | W38 | NuW38 | 3.700 |     |       |
| N07 | Nu | W38 | NuW38 | 2.695 |     |       |
| N08 | Nu | W38 | NuW38 | NA    |     |       |
| N09 | Nu | W38 | NuW38 | 3.502 |     |       |
| N10 | Nu | W38 | NuW38 | NA    |     |       |
| P01 | pH | W38 | pHW38 | NA    |     |       |
| P02 | pH | W38 | pHW38 | NA    |     |       |
| P03 | pH | W38 | pHW38 | 2.521 |     |       |
| P04 | pH | W38 | pHW38 | 0.000 |     |       |
| P05 | pH | W38 | pHW38 | NA    |     |       |
| P06 | pH | W38 | pHW38 | 1.760 |     |       |
| P07 | pH | W38 | pHW38 | 3.565 |     |       |
| P08 | pH | W38 | pHW38 | 3.409 |     |       |
| P09 | pH | W38 | pHW38 | 0.000 |     |       |
| P10 | pH | W38 | pHW38 | 2.704 |     |       |
| F01 | Fa | W38 | FaW38 | 3.154 |     |       |
| F02 | Fa | W38 | FaW38 | NA    |     |       |
| F03 | Fa | W38 | FaW38 | 3.742 |     |       |
| F04 | Fa | W38 | FaW38 | 2.201 |     |       |
| F05 | Fa | W38 | FaW38 | 3.439 |     |       |

|     |    |     |       |       |     |       |
|-----|----|-----|-------|-------|-----|-------|
| F06 | Fa | W38 | FaW38 | 3.625 |     |       |
| F07 | Fa | W38 | FaW38 | 3.438 |     |       |
| F08 | Fa | W38 | FaW38 | 3.129 |     |       |
| F09 | Fa | W38 | FaW38 | 2.653 |     |       |
| F10 | Fa | W38 | FaW38 | 0.000 |     |       |
| H01 | He | W38 | HeW38 | 2.936 |     |       |
| H02 | He | W38 | HeW38 | 0.000 |     |       |
| H03 | He | W38 | HeW38 | 0.000 |     |       |
| H04 | He | W38 | HeW38 | 0.000 |     |       |
| H05 | He | W38 | HeW38 | 3.701 |     |       |
| H06 | He | W38 | HeW38 | NA    |     |       |
| H07 | He | W38 | HeW38 | 2.893 |     |       |
| H08 | He | W38 | HeW38 | 0.000 |     |       |
| H09 | He | W38 | HeW38 | 3.403 |     |       |
| H10 | He | W38 | HeW38 | 2.804 |     |       |
| N01 | Nu | W41 | NuW41 | 0.000 | 4.5 | 7193  |
| N02 | Nu | W41 | NuW41 | 3.716 | 5.5 | 11257 |
| N03 | Nu | W41 | NuW41 | 0.000 | 4   | 3168  |
| N04 | Nu | W41 | NuW41 | 4.322 | 5.5 | 13167 |
| N05 | Nu | W41 | NuW41 | 2.481 | 3.5 | 2239  |
| N06 | Nu | W41 | NuW41 | 3.447 | 3.5 | 7322  |
| N07 | Nu | W41 | NuW41 | 3.262 | 5.5 | 14011 |
| N08 | Nu | W41 | NuW41 | NA    | 4   | 6603  |
| N09 | Nu | W41 | NuW41 | 3.727 | 5.5 | 8612  |
| N10 | Nu | W41 | NuW41 | NA    | 5.5 | 3986  |
| P01 | pH | W41 | pHW41 | 0.000 | 4   | 3088  |
| P02 | pH | W41 | pHW41 | NA    | 5   | 5763  |
| P03 | pH | W41 | pHW41 | NA    | 4.5 | 6374  |
| P04 | pH | W41 | pHW41 | NA    | 6.5 | 7268  |
| P05 | pH | W41 | pHW41 | NA    | 5   | 5855  |
| P06 | pH | W41 | pHW41 | 2.502 | 4   | 3408  |
| P07 | pH | W41 | pHW41 | 3.970 | 4.5 | 2718  |
| P08 | pH | W41 | pHW41 | 3.580 | 4.5 | 6586  |
| P09 | pH | W41 | pHW41 | 2.980 | 6.5 | 11081 |
| P10 | pH | W41 | pHW41 | 2.830 | 5   | 4382  |
| F01 | Fa | W41 | FaW41 | 3.545 | 4.5 | 9046  |
| F02 | Fa | W41 | FaW41 | 2.816 | 4   | 6653  |
| F03 | Fa | W41 | FaW41 | 3.672 | 3.5 | 4059  |
| F04 | Fa | W41 | FaW41 | 2.232 | 3   | 2781  |
| F05 | Fa | W41 | FaW41 | 3.290 | 3.5 | 5767  |
| F06 | Fa | W41 | FaW41 | 3.640 | 3.5 | 4574  |
| F07 | Fa | W41 | FaW41 | 3.432 | 3.5 | 4505  |
| F08 | Fa | W41 | FaW41 | 2.878 | 3   | 1939  |
| F09 | Fa | W41 | FaW41 | 3.049 | 3.5 | 7792  |
| F10 | Fa | W41 | FaW41 | 1.923 | 2   | 341   |
| H01 | He | W41 | HeW41 | 3.390 | 4.5 | 13496 |

|     |    |     |       |       |     |       |
|-----|----|-----|-------|-------|-----|-------|
| H02 | He | W41 | HeW41 | 0.000 | 4   | 1951  |
| H03 | He | W41 | HeW41 | 0.000 | 4.5 | 4406  |
| H04 | He | W41 | HeW41 | 0.000 | 4   | 4356  |
| H05 | He | W41 | HeW41 | 3.598 | 6   | 9559  |
| H06 | He | W41 | HeW41 | NA    | 6.5 | 11602 |
| H07 | He | W41 | HeW41 | 2.996 | 5.5 | 8530  |
| H08 | He | W41 | HeW41 | 0.000 | 4   | 449   |
| H09 | He | W41 | HeW41 | 3.841 | 6.5 | 8311  |
| H10 | He | W41 | HeW41 | 3.465 | 5.5 | 12322 |
