# Supplementary material for: Chickens can durably clear herpesvirus vaccine infection in feathers while still carrying vaccine-induced antibodies
Source: Springer Nature journal article supplement (doi:10.1186/s13567-020-00749-1), 2020-02-24
Supplement: MOESM2 [file 13567_2020_749_MOESM2_ESM.pdf]

Additional file 2. HVT loads in spleens at week 41

| Bird | HVT load (log) |
|------|----------------|
| N1   | NI*            |
| N2   | 4,813          |
| N3   | 0,000          |
| N4   | 3,927          |
| N5   | 1,728          |
| N6   | 3,907          |
| N7   | 3,846          |
| N8   | 3,562          |
| N9   | 3,932          |
| N10  | 3,572          |
| P1   | 1,806          |
| P2   | 3,628          |
| P3   | 4,440          |
| P4   | 3,318          |
| P5   | 3,923          |
| P6   | 2,378          |
| P7   | 3,466          |
| P8   | 3,248          |
| P9   | 2,939          |
| P10  | 3,992          |
| F1   | 3,758          |
| F2   | 4,619          |
| F3   | 4,056          |
| F4   | 3,081          |
| F5   | 4,132          |
| F6   | 3,872          |
| F7   | 4,001          |
| F8   | 4,118          |
| F9   | 2,981          |
| F10  | 1,966          |
| H1   | 2,987          |
| H2   | 0,000          |
| H3   | 0,000          |
| H4   | 0,000          |
| H5   | 3,310          |
| H6   | 3,772          |
| H7   | 2,857          |
| H8   | no DNA         |
| H9   | 3,745          |
| H10  | NI             |

\* NI: uninterpretable
